# Supplementary material
Source: publisher figshare collection journal article supplement (https://aacr.figshare.com/articles/dataset/_/22535564)
Supplement: Supplementary file 1 [file 39998840]

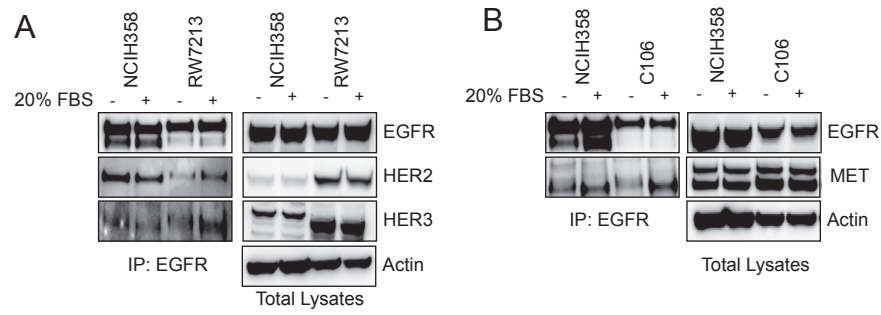

**Supplementary Figure 2: EGFR Immunoprecipitation (IP) assay.** Western blot analysis of EGFR dimerization partners upon FBS stimulation. (A) RW7213, (B) C106. NCIH358 NSCLC cell line was included as control. Cetuximab was used to immunoprecipitate EGFR.
